# Supplementary material for: Structural diversity and hydrogen storage properties in the system K–Si–H
Source: Royal Society of Chemistry journal article supplement (doi:10.1039/d2cp00298a), 2022-01-01
Supplement: d2cp00298a1.pdf [file d2cp00298a1.pdf]

# Supporting Information

## For

### Structural diversity and hydrogen storage properties in the system K-Si-H

<sup>1</sup>*State Key Laboratory of Superhard Materials, college of Physics, Jilin University, Changchun  
130012, PR China*

<sup>2</sup>*Department of Physics and Electronic Engineering, Hebei Normal University for Nationalities,  
Chengde, 067000, China*

<sup>3</sup>*Institute of High Pressure Physics, School of Physical Science and Technology, Ningbo University,  
Ningbo, 315211, PR China*

<sup>4</sup>*Center for High Pressure Science and Technology Advanced Research (HPSTAR), Shanghai  
201203, P. R. China*

<sup>5</sup>*Department of Earth Science, University of Cambridge, Downing Site, Cambridge CB2 3EQ,  
United Kingdom*

<sup>6</sup>*Asian School of the Environment and School of Materials Science and Engineering, 50 Nanyang  
Avenue, Nanyang Technological University, Singapore 639798*

<sup>7</sup>*Department of Materials Science & Metallurgy, University of Cambridge, 27 Charles Babbage  
Road, Cambridge CB3 0FS, United Kingdom*

<sup>8</sup>*Advanced Institute for Materials Research, Tohoku University 2-1-1 Katahira, Aoba, Sendai, 980-  
8577, Japan*

\*Corresponding author. [cuitian@nbu.edu.cn](mailto:cuitian@nbu.edu.cn) or [cuitian@jlu.edu.cn](mailto:cuitian@jlu.edu.cn)

†Corresponding author. [duandf@jlu.edu.cn](mailto:duandf@jlu.edu.cn)

## Computational details

Full variable-composition predictions were firstly performed within 4000 structures using random structure searches based on the AIRSS code at pressures of 1atm, 50 and 100 GPa. Within the basic AIRSS approach a cell volume and shape is selected at random within a reasonable range; atoms are added at random positions to provide the desired stoichiometry and the system is relaxed until the forces on the atoms are negligible and the pressure takes the required value. Repeating this procedure provides a relatively sparse sampling of the ‘structure space’. We constrained the minimum atomic distances of 1-3 Å in the initial structures, which helps to space out the atoms appropriately and also retain a high degree of randomness. We performed searches with various different symmetry constraints, which is useful because low-energy structures often possess symmetries. The CASTEP code [1] with on-the-fly (OTF) generation of ultrasoft pseudopotentials was used during the AIRSS searches. The `cut_off_energy` and `kpoints_mp_spacing` parameters were chosen to be 500 eV and  $2\pi \times 0.07 \text{ \AA}^{-1}$ . Fixed-composition predictions were employed to further search stable or metastable structures for stable compounds with 1-4 formula units by means of CALYPSO and USPEX codes, during which the geometrical optimizations were performed by VASP (Vienna ab initio simulation packages) code. The cutoff energy and k-point mesh were set as 400 eV and  $2\pi \times 0.07 \text{ \AA}^{-1}$ . For most of the cases, the fixed-composition structure searches reached convergence after 40 generations, generating about 1600 structures. The predicted low-enthalpy structures were then optimized at a higher accuracy using VASP code.

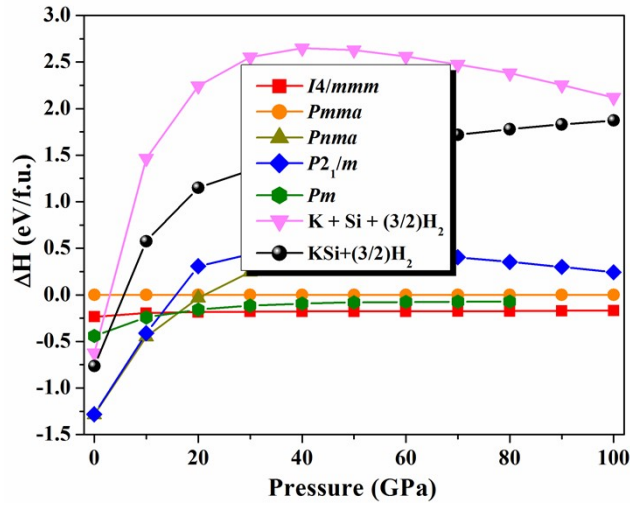

Fig. S1. Enthalpy curves of various structures of  $KSiH_3$  relative to  $Pmma$  structure as a function of pressure. The enthalpies for  $KSiH_3$  with respect to  $K + Si + H_2$  are also provided. As shown, two competitive structures of  $P2_1/m$  and  $Pnma$  have lower enthalpies at ambient conditions. The vertical coordinates of  $P2_1/m$  and  $Pnma$  are  $-1.280$  eV/f.u. and  $-1.287$  eV/f.u., respectively, indicating that  $KSiH_3$  prefers  $Pnma$  phase.

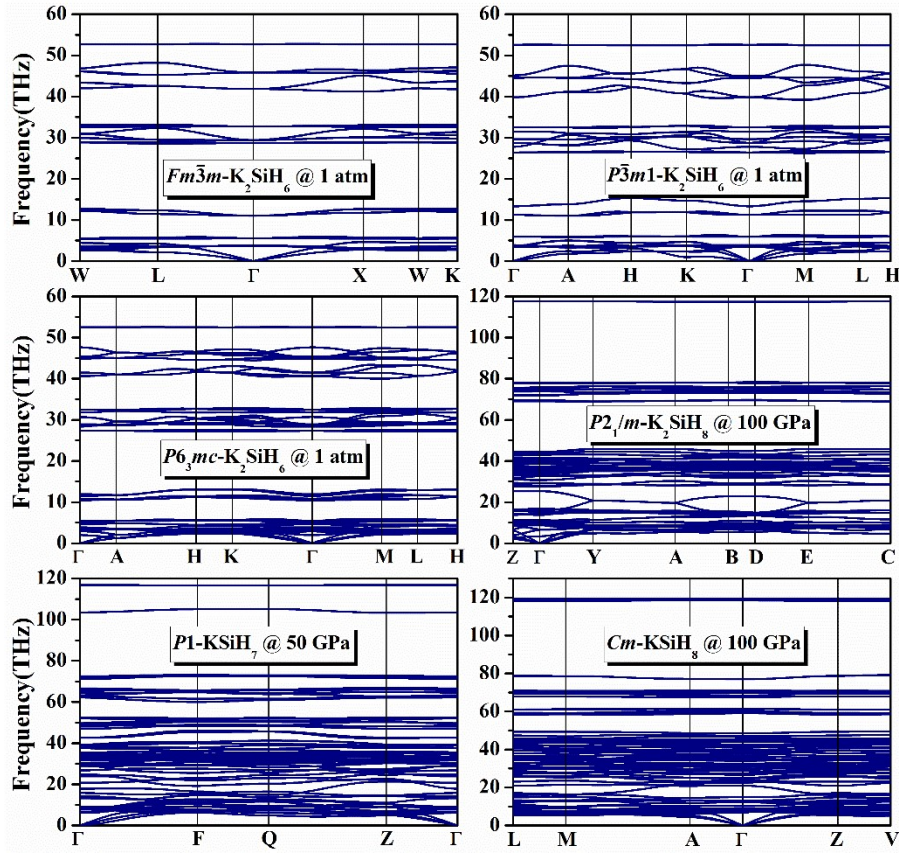

Fig. S2 Calculated phonon dispersion curves for K-Si-H phases at corresponding pressures.

Table S1. Calculated elastic constants for K-Si-H compounds.

| Crystal structure                                        | $C_{ij}$ (kBar)                                                                                                                                                                                                                                                                                                                                                                                                                                                                                                               |
|----------------------------------------------------------|-------------------------------------------------------------------------------------------------------------------------------------------------------------------------------------------------------------------------------------------------------------------------------------------------------------------------------------------------------------------------------------------------------------------------------------------------------------------------------------------------------------------------------|
| $Fm\bar{3}m$ -K <sub>2</sub> SiH <sub>6</sub><br>(1 atm) | $C_{11} = 322, C_{44} = 105, C_{12} = 106.$                                                                                                                                                                                                                                                                                                                                                                                                                                                                                   |
| $P\bar{3}m1$ -K <sub>2</sub> SiH <sub>6</sub><br>(1 atm) | $C_{11} = 482, C_{33} = 214, C_{44} = 62, C_{66} = 183, C_{12} = 116, C_{13} = 45.$                                                                                                                                                                                                                                                                                                                                                                                                                                           |
| $P6_3mc$ -K <sub>2</sub> SiH <sub>6</sub><br>(1 atm)     | $C_{11} = 385, C_{33} = 263, C_{44} = 95, C_{66} = 126, C_{12} = 133, C_{13} = 86.$                                                                                                                                                                                                                                                                                                                                                                                                                                           |
| $P2_1/m$ -K <sub>2</sub> SiH <sub>8</sub><br>(100 GPa)   | $C_{11} = 3507, C_{22} = 3184, C_{33} = 3916, C_{44} = 554, C_{55} = 1281, C_{66} = 1543, C_{12} = 1483, C_{13} = 1279, C_{23} = 1983, C_{15} = 109, C_{25} = -176, C_{35} = 59, C_{46} = -71.$                                                                                                                                                                                                                                                                                                                               |
| $P1$ -KSiH <sub>7</sub><br>(50 GPa)                      | $C_{11} = 2343, C_{12} = 567, C_{13} = 829, C_{14} = -189, C_{15} = -76, C_{16} = 87, C_{21} = 567, C_{22} = 2334, C_{23} = 1112, C_{24} = -11, C_{25} = -55, C_{26} = 133, C_{31} = 829, C_{32} = 1112, C_{33} = 2034, C_{34} = 149, C_{35} = 129, C_{36} = -86, C_{41} = -189, C_{42} = -11, C_{43} = 149, C_{44} = 1007, C_{45} = 140, C_{46} = 31, C_{51} = -75, C_{52} = -55, C_{53} = 129, C_{54} = 140, C_{55} = 551, C_{56} = -82, C_{61} = 87, C_{62} = 133, C_{63} = -86, C_{64} = 31, C_{65} = -82, C_{66} = 549.$ |
| $Cm$ -KSiH <sub>8</sub><br>(100 GPa)                     | $C_{11} = 3742, C_{22} = 3690, C_{33} = 3659, C_{44} = 1462, C_{55} = 1508, C_{66} = 1350, C_{12} = 1637, C_{13} = 1356, C_{23} = 1343, C_{15} = -4, C_{25} = -58, C_{35} = -193, C_{46} = 269.$                                                                                                                                                                                                                                                                                                                              |

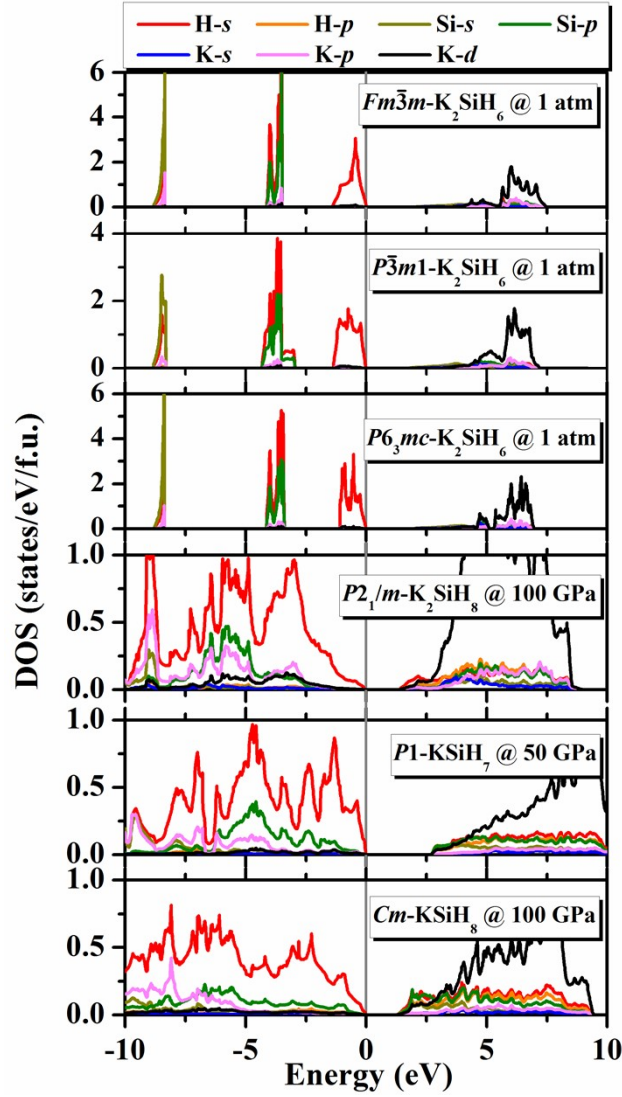

Fig. S3 Calculated projected density of states for K-Si-H phases. Fermi level is set at zero energy and marked by the vertical solid line. It is shown that the gaps between the valence and conduction bands give all studied compounds the properties of insulating materials. In  $\text{K}_2\text{SiH}_6$  phases, there are quite large contributions of H-s orbit on the highest valence bands in comparison to that in other compounds. Furthermore, it is noted that the weak Si-p and H-s orbital hybridization in the valence band region can be seen, which contributes the weak bonding interactions between Si and H atoms.

Table S2. The calculated charge values of K, Si and H atoms.  $\delta(e)$  represents the lost charge. It is shown that the charge is transferred from K and Si to H atoms.

| Structure<br>Pressure                                                          | Atom | Charge value | $\delta(e)$ |
|--------------------------------------------------------------------------------|------|--------------|-------------|
| <i>Fm</i> $\bar{3}m$ -K <sub>2</sub> SiH <sub>6</sub><br>1 atm                 | H1   | 1.70         | -0.70       |
|                                                                                | Si1  | 1.41         | 2.59        |
|                                                                                | K1   | 8.19         | 0.81        |
| <i>P</i> $\bar{3}m1$ -K <sub>2</sub> SiH <sub>6</sub><br>1 atm                 | H1   | 1.70         | -0.70       |
|                                                                                | Si1  | 1.42         | 2.58        |
|                                                                                | K1   | 8.20         | 0.80        |
| <i>P</i> <sub>63</sub> <i>mc</i> -K <sub>2</sub> SiH <sub>6</sub><br>1 atm     | H1   | 1.70         | -0.7        |
|                                                                                | H7   | 1.70         | -0.7        |
|                                                                                | Si1  | 1.41         | 2.59        |
|                                                                                | K1   | 8.19         | 0.81        |
|                                                                                | K3   | 8.19         | 0.81        |
| <i>P</i> <sub>21</sub> / <i>m</i> - K <sub>2</sub> SiH <sub>8</sub><br>100 GPa | H1   | 1.66         | -0.66       |
|                                                                                | H2   | 1.66         | -0.66       |
|                                                                                | H3   | 1.03         | -0.03       |
|                                                                                | H13  | 1.65         | -0.65       |
|                                                                                | H15  | 1.66         | -0.66       |
|                                                                                | Si1  | 1.18         | 2.82        |
|                                                                                | K1   | 8.42         | 0.58        |
|                                                                                | K3   | 8.41         | 0.59        |
| <i>P</i> 1- KSiH <sub>7</sub><br>50 GPa                                        | H1   | 1.66         | -0.66       |
|                                                                                | H2   | 1.73         | -0.73       |
|                                                                                | H3   | 1.66         | -0.66       |
|                                                                                | H4   | 1.65         | -0.65       |
|                                                                                | H5   | 1.70         | -0.70       |
|                                                                                | H6   | 1.65         | -0.65       |
|                                                                                | H7   | 1.64         | -0.64       |
|                                                                                | H8   | 1.07         | -0.07       |
|                                                                                | H9   | 1.65         | -0.65       |
|                                                                                | H10  | 0.97         | 0.03        |
|                                                                                | H11  | 1.64         | -0.64       |
|                                                                                | H12  | 1.66         | -0.66       |
|                                                                                | H13  | 0.96         | 0.04        |
|                                                                                | H14  | 1.07         | -0.07       |
| Si1                                                                            | 1.31 | 2.69         |             |
| Si2                                                                            | 1.32 | 2.68         |             |
| K1                                                                             | 8.32 | 0.68         |             |
| K2                                                                             | 8.33 | 0.67         |             |

---

|                               |     |      |       |
|-------------------------------|-----|------|-------|
|                               | H1  | 1.65 | -0.65 |
|                               | H2  | 1.00 | 0.00  |
|                               | H3  | 1.62 | -0.62 |
|                               | H4  | 1.61 | -0.61 |
|                               | H5  | 1.06 | -0.06 |
|                               | H11 | 1.70 | -0.70 |
| <i>Cm</i> - KSiH <sub>8</sub> | H12 | 1.75 | -0.75 |
| 100 GPa                       | H13 | 1.02 | -0.02 |
|                               | H14 | 1.59 | -1.59 |
|                               | H15 | 1.61 | -0.61 |
|                               | H16 | 1.03 | -0.03 |
|                               | Si1 | 1.31 | 2.69  |
|                               | Si2 | 1.36 | 2.64  |
|                               | K1  | 8.37 | 0.63  |

---



Table S3. Structural information of K-Si-H compounds under different pressures.

| Structure<br>Pressure                                   | Lattice<br>parameters<br>(Å, °) | Atomic coordinates (fractional) |       |        |        | Sites |
|---------------------------------------------------------|---------------------------------|---------------------------------|-------|--------|--------|-------|
| $Fm\bar{3}m$ -K <sub>2</sub> SiH <sub>6</sub><br>1 atm  | a = b = c = 7.867               | H1                              | 0.500 | -0.205 | -0.500 | 24e   |
|                                                         | α = β = γ = 90                  | Si1                             | 0.000 | 0.000  | 0.000  | 4a    |
|                                                         |                                 | K1                              | 0.250 | -0.250 | -0.250 | 8c    |
| $P\bar{3}m1$ -K <sub>2</sub> SiH <sub>6</sub><br>50 GPa | a = b = 4.531                   | H1                              | 0.159 | 0.841  | 0.745  | 6i    |
|                                                         | c = 3.464                       | Si1                             | 0.000 | 0.000  | 0.500  | 1b    |
|                                                         | α = β = 90<br>γ = 120           | K1                              | 0.667 | 0.333  | 0.778  | 2d    |
| $P6_3mc$ -K <sub>2</sub> SiH <sub>6</sub><br>1 atm      | a = b = 5.490                   | H1                              | 0.193 | 0.807  | 0.868  | 6c    |
|                                                         | c = 9.074                       | H7                              | 0.057 | 0.529  | 0.073  | 6c    |
|                                                         | α = β = 90                      | Si1                             | 0.333 | 0.667  | 0.969  | 2b    |
|                                                         | γ = 120                         | K1                              | 0.667 | 0.333  | 0.847  | 2b    |
|                                                         |                                 | K3                              | 0.000 | 0.000  | 0.604  | 2a    |
| $P2_1/m$ -K <sub>2</sub> SiH <sub>8</sub><br>100 GPa    | a = 3.112                       | H1                              | 0.521 | 0.500  | 0.838  | 4f    |
|                                                         | b = 4.193                       | H2                              | 0.788 | 0.994  | 0.708  | 4f    |
|                                                         | c = 9.616                       | H3                              | 0.444 | 0.953  | 0.461  | 4f    |
|                                                         | α = 90                          | H13                             | 0.779 | 0.750  | 0.373  | 2e    |
|                                                         | β = 119.04                      | H15                             | 0.102 | 0.250  | 0.912  | 2e    |
|                                                         | γ = 90                          | Si1                             | 0.852 | 0.750  | 0.232  | 2e    |
|                                                         |                                 | K1                              | 0.137 | 0.750  | 0.934  | 2e    |
|                                                         | K3                              | 0.826                           | 0.250 | 0.387  | 2e     |       |
| $P1$ -KSiH <sub>7</sub><br>50 GPa                       | a = 5.591                       | H1                              | 0.015 | 0.613  | 0.481  | 1a    |
|                                                         | b = 5.264                       | H2                              | 0.040 | 0.212  | 0.487  | 1a    |
|                                                         | c = 3.952                       | H3                              | 0.461 | 0.016  | 0.636  | 1a    |
|                                                         | α = 71.65                       | H4                              | 0.333 | 0.077  | 0.996  | 1a    |
|                                                         | β = 109.37                      | H5                              | 0.904 | 0.291  | 0.878  | 1a    |
|                                                         | γ = 76.75                       | H6                              | 0.196 | 0.444  | 0.132  | 1a    |
|                                                         |                                 | H7                              | 0.618 | 0.714  | 0.451  | 1a    |
|                                                         |                                 | H8                              | 0.777 | 0.040  | 0.148  | 1a    |
|                                                         |                                 | H9                              | 0.141 | 0.878  | 0.351  | 1a    |
|                                                         |                                 | H10                             | 0.353 | 0.798  | 0.933  | 1a    |
|                                                         |                                 | H11                             | 0.620 | 0.318  | 0.359  | 1a    |
|                                                         |                                 | H12                             | 0.708 | 0.622  | 0.975  | 1a    |
|                                                         |                                 | H13                             | 0.668 | 0.978  | 0.131  | 1a    |
|                                                         |                                 | H14                             | 0.340 | 0.664  | 0.052  | 1a    |
|                                                         |                                 | Si1                             | 0.805 | 0.487  | 0.406  | 1a    |
|                                                         | Si2                             | 0.212                           | 0.140 | 0.252  | 1a     |       |
|                                                         | K1                              | 0.905                           | 0.882 | 0.774  | 1a     |       |
|                                                         | K2                              | 0.429                           | 0.438 | 0.716  | 1a     |       |
| $Cm$ -KSiH <sub>8</sub>                                 | a = 7.377                       | H1                              | 0.394 | 0.383  | 0.115  | 4b    |

|         |                        |     |       |        |       |    |
|---------|------------------------|-----|-------|--------|-------|----|
| 100 GPa | $b = 7.928$            | H2  | 0.471 | 0.134  | 0.946 | 4b |
|         | $c = 3.041$            | H3  | 0.555 | 0.319  | 0.391 | 4b |
|         | $\alpha = \gamma = 90$ | H4  | 0.596 | 0.150  | 0.294 | 4b |
|         | $\beta = 66.01$        | H5  | 0.462 | -0.229 | 0.965 | 4b |
|         |                        | K1  | 0.261 | -0.226 | 0.671 | 4b |
|         |                        | H11 | 0.105 | -0.000 | 0.778 | 2a |
|         |                        | H12 | 0.849 | -0.000 | 0.710 | 2a |
|         |                        | H13 | 0.408 | -0.000 | 0.384 | 2a |
|         |                        | H14 | 0.275 | -0.000 | 0.139 | 2a |
|         |                        | H15 | 0.608 | -0.000 | 0.796 | 2a |
|         |                        | H16 | 0.410 | -0.000 | 0.631 | 2a |
|         |                        | Si1 | 0.049 | -0.000 | 0.316 | 2a |
|         |                        | Si2 | 0.714 | -0.000 | 0.251 | 2a |

## Reference

- [1] M. D. Segall, J. D. L. Philip, M. J. Probert, C. J. Pickard, P. J. Hasnip, S. J. Clark, and M. C. Payne, *J. Phys.: Condens. Matter* **14**, 2717 (2002).
